# Supplementary material for: Microporous organic polymers with acetal linkages: synthesis, characterization, and gas sorption properties
Source: Royal Society of Chemistry journal article supplement (doi:10.1039/c3py00854a), 2013-08-22
Supplement: c3py00854a.pdf [file c3py00854a.pdf]

Electronic supplementary information (ESI) for

**Microporous organic polymers with acetal linkages: synthesis, characterization, and gas sorption properties**

Yan-Chao Zhao,<sup>†,‡</sup> Li-Min Zhang,<sup>†</sup> Tao Wang,<sup>†</sup> and Bao-Hang Han<sup>\*,†</sup>

<sup>†</sup> *National Center for Nanoscience and Technology, Beijing 100190, China*

<sup>‡</sup> *University of Chinese Academy of Sciences, Beijing 100049, China*

Tel: +86 10 8254 5576. E-mail: [hanbh@nanoctr.cn](mailto:hanbh@nanoctr.cn).

### *Synthesis of 4,4'-Biphenyldicarboxaldehyde (M2)*

4,4'-Biphenyldicarboxaldehyde (**M2**) was prepared following a modified procedure given in the literature.<sup>S1</sup> 4-Bromobenzaldehyde (100 mg, 0.54 mmol) and 4-formylphenylboronic acid (81 mg, 0.54 mmol) were dissolved in 10 mL of tetrahydrofuran. Aqueous solution of potassium carbonate (5.0 mL, 2.0 mol L<sup>-1</sup>) was added into the solution under nitrogen atmosphere. After the addition of bis(triphenylphosphine)palladium(II) dichloride (30 mg), the mixture was refluxed for 12 h. The solution was extracted thrice with dichloromethane (3 × 100 mL). The obtained organic layer was washed with plenty of water and the solvent was removed at reduced pressure. The residue was chromatographed on a silica gel column to give a yellow solid with 93 % yield. M.p.: 146–147 °C; <sup>1</sup>H NMR (400 MHz, CDCl<sub>3</sub>): δ (ppm) 10.09 (s, 2H, -CHO), 8.02 (d, *J* = 8.0 Hz, 4H, Ar-*H*), 7.82 (d, *J* = 8.0 Hz, 4H, Ar-*H*); IR (KBr, cm<sup>-1</sup>): 3075, 2986, 2896, 1664, 1575, 1466, 1390, 1335, 1274, 1205, 1143, 1061, 890, 808, 685, 589, 507.

### *Synthesis of 1,3,5-tris(4-formylphenyl)benzene (M3)*

1,3,5-Tris(4-formylphenyl)benzene (**M3**) was prepared following a modified procedure given in the literature.<sup>S1</sup> 1,3,5-Tribromobenzene (100 mg, 0.32 mmol), 4-formylphenylboronic acid (145 mg, 0.94 mmol), and bis(triphenylphosphine)palladium(II) dichloride (30 mg) were reacted in tetrahydrofuran and aqueous solution of potassium carbonate to afford

1,3,5-tris(4-formylphenyl)benzene (**M3**) in 92 % yield. M.p.: 245–247 °C; <sup>1</sup>H NMR (400 MHz, CDCl<sub>3</sub>): δ (ppm) 10.10 (s, 3H, -CHO), 8.02 (d, *J* = 8.0 Hz, 6H, Ar-*H*), 7.91 (s, 3H, Ar-*H*), 7.86 (d, *J* = 8.0 Hz, 6H, Ar-*H*); IR (KBr, cm<sup>-1</sup>): 3051, 2927, 2811, 2720, 1603, 1389, 1317, 1220, 1174, 1109, 863, 817, 687, 519.

#### *Synthesis of 1,3,5-tris(4-formylbiphenyl)benzene (M4)*

1,3,5-Tris(4-formylbiphenyl)benzene (**M4**) was prepared following a modified procedure given in the literature.<sup>S1</sup> 1,3,5-Tri(4-bromophenyl)benzene (100 mg, 0.19 mmol), 4-formylphenylboronic acid (83 mg, 0.57 mmol), and bis(triphenylphosphine)palladium(II) dichloride (30 mg) were reacted in tetrahydrofuran and aqueous solution of potassium carbonate to afford 1,3,5-tris(4-formylbiphenyl)benzene (**M4**) in 88 % yield. M.p.: 158–160 °C; <sup>1</sup>H NMR (400 MHz, CDCl<sub>3</sub>): δ (ppm) 10.09 (s, 3H, -CHO), 7.99 (d, *J* = 8.0 Hz, 6H, Ar-*H*), 7.92 (s, 3H, Ar-*H*), 7.85 (t, *J* = 8.0 Hz, 12H, Ar-*H*), 7.79 (d, *J* = 8.0 Hz, 6H, Ar-*H*); IR (KBr, cm<sup>-1</sup>): 3032, 2928, 2817, 2726, 1707, 1602, 1388, 1311, 1214, 1168, 1116, 1006, 857, 817, 720, 642, 500.

#### *Synthesis of tris(4-formylbiphenyl)amine (M5)*

Tris(4-formylbiphenyl)amine (**M5**) was prepared following a modified procedure given in the literature.<sup>S1</sup> Tris(4-iodophenyl)amine (100 mg, 0.16 mmol), 4-formylphenylboronic acid (72 mg, 0.48 mmol), and

bis(triphenylphosphine)palladium(II) dichloride (30 mg) were reacted in tetrahydrofuran and aqueous solution of potassium carbonate to afford tris(4-formylbiphenyl)amine (**M5**) in 81 % yield. M.p.: 277–279 °C; <sup>1</sup>H NMR (400 MHz, CDCl<sub>3</sub>): δ (ppm) 10.05 (s, 3H, –CHO), 7.96 (d, *J* = 8.0 Hz, 6H, Ar–*H*), 7.77 (d, *J* = 8.0 Hz, 6H, Ar–*H*), 7.62 (d, *J* = 8.0 Hz, 6H, Ar–*H*), 7.29 (d, *J* = 8.0 Hz, 6H, Ar–*H*); IR (KBr, cm<sup>-1</sup>): 3032, 2830, 2732, 1701, 1590, 1525, 1499, 1285, 1180, 824, 714, 649, 571.

#### References:

(S1) Y.-C. Zhao, T. Wang, L.-M. Zhang, Y. Cui and B.-H. Han, Facile approach to preparing microporous organic polymers through benzoin condensation. *ACS Appl. Mater. Interfaces*, 2012, **4**(12), 6975–6981.

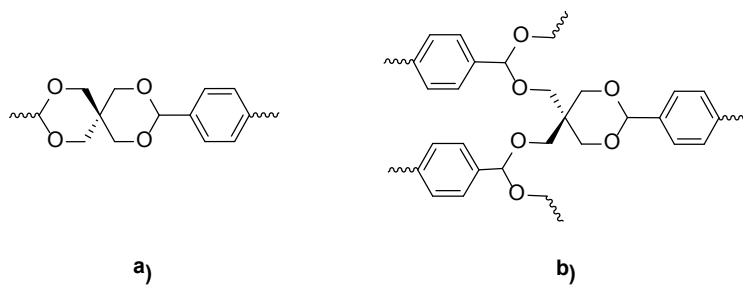

**Fig. S1** Linear acetal-linked structures (a) and branched hemiacetal-linked structures (b) in APOPs.

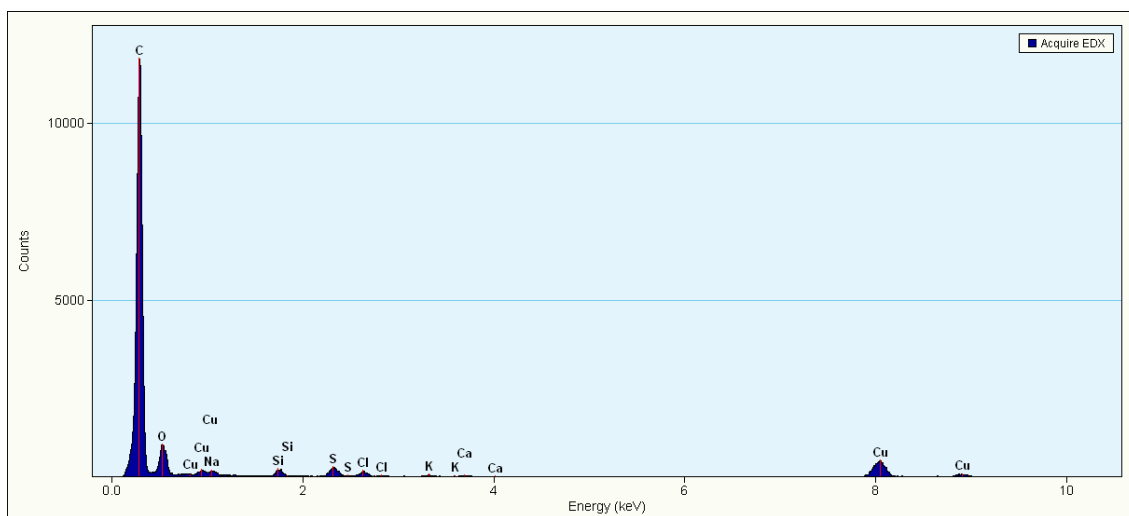

**Fig. S2** EDX spectrum of APOP-1.

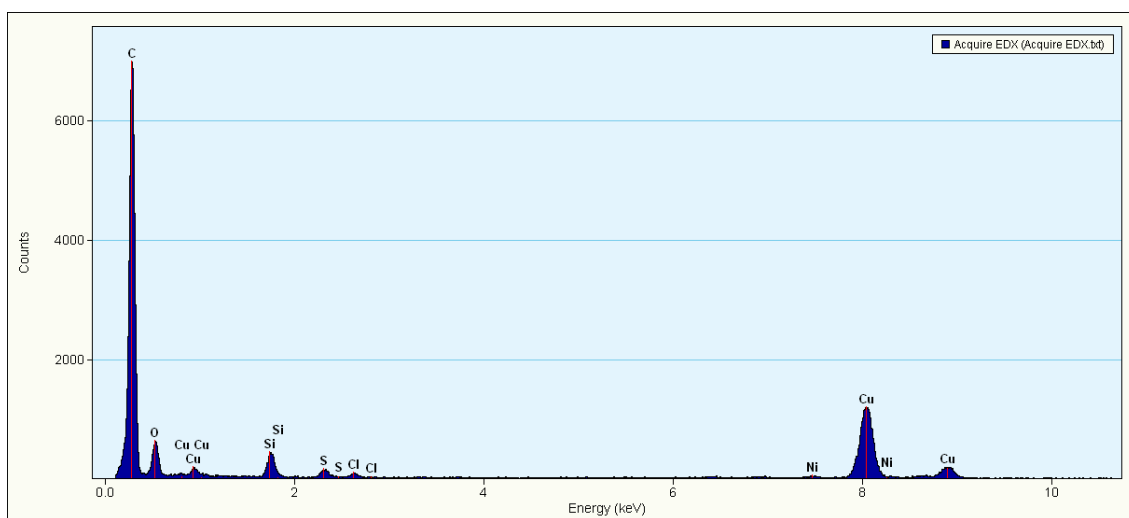

**Fig. S3** EDX spectrum of APOP-2.

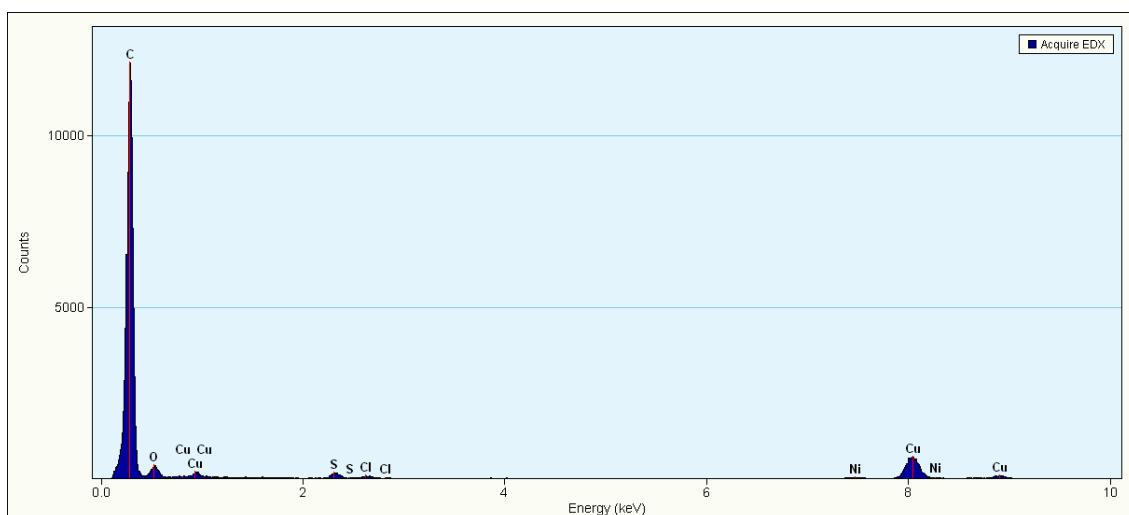

**Fig. S4** EDX spectrum of APOP-3.

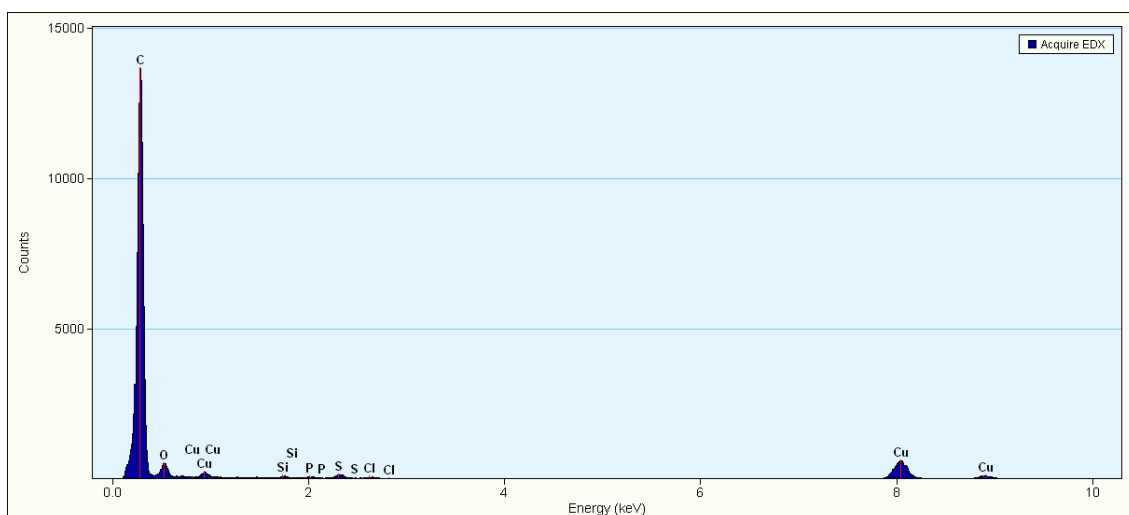

**Fig. S5** EDX spectrum of APOP-4.

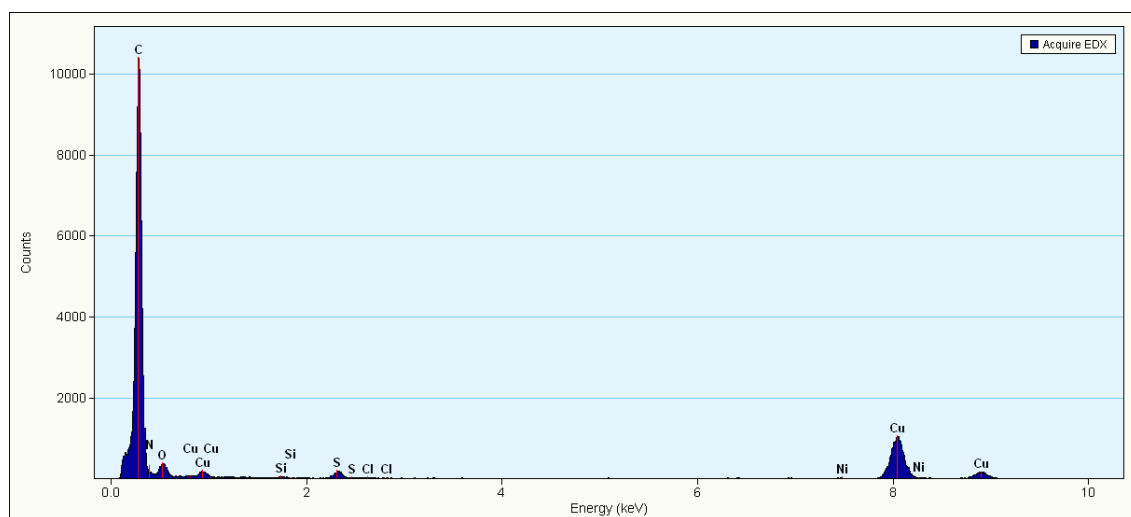

**Fig. S6** EDX spectrum of APOP-5.



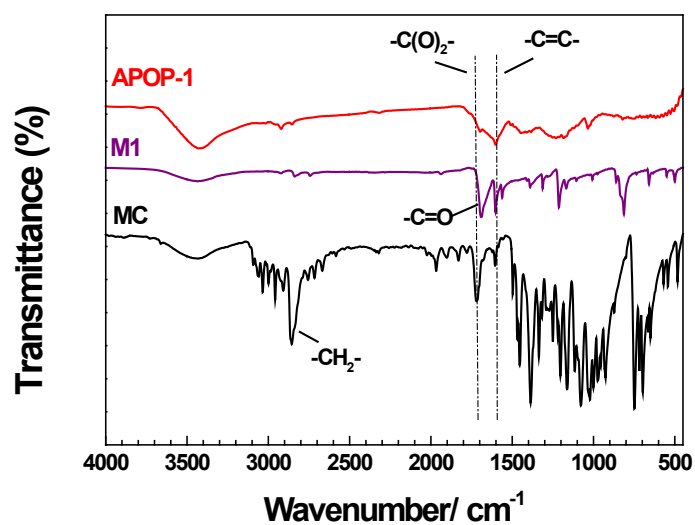

**Fig. S7** FT-IR spectra of terephthalic aldehyde (**M1**), **APOP-1**, and model compound (**MC**).

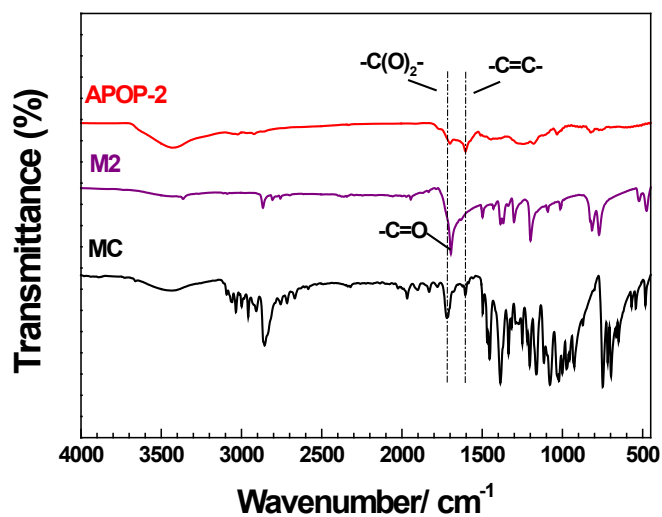

**Fig. S8** FT-IR spectra of 4,4'-Biphenyldicarboxaldehyde (**M2**), **APOP-2**, and model compound (**MC**).

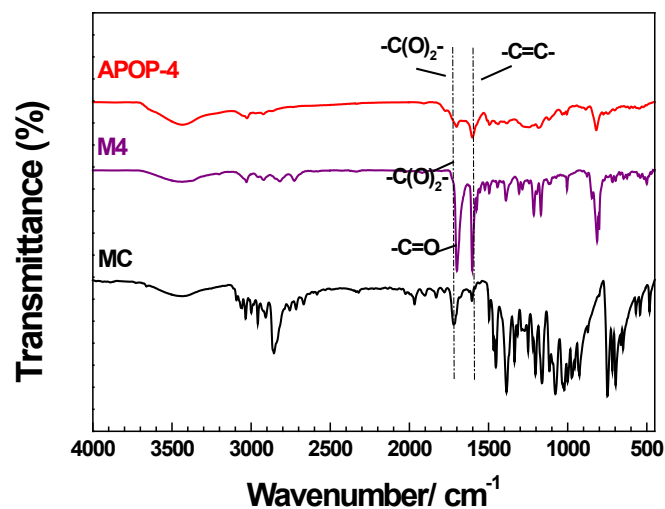

**Fig. S9** FT-IR spectra of 1,3,5-tri(4-formylbiphenyl)benzene (**M4**), **APOP-4**, and model compound (**MC**).

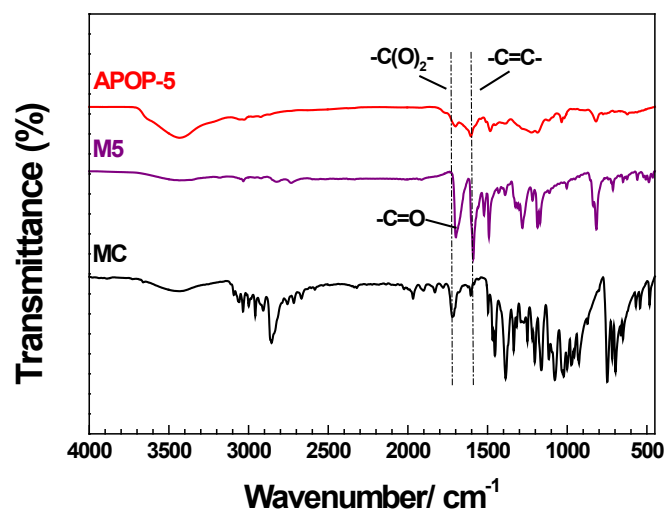

**Fig. S10** FT-IR spectra of tri(4-formylbiphenyl)amine (**M5**), **APOP-5**, and model compound (**MC**).

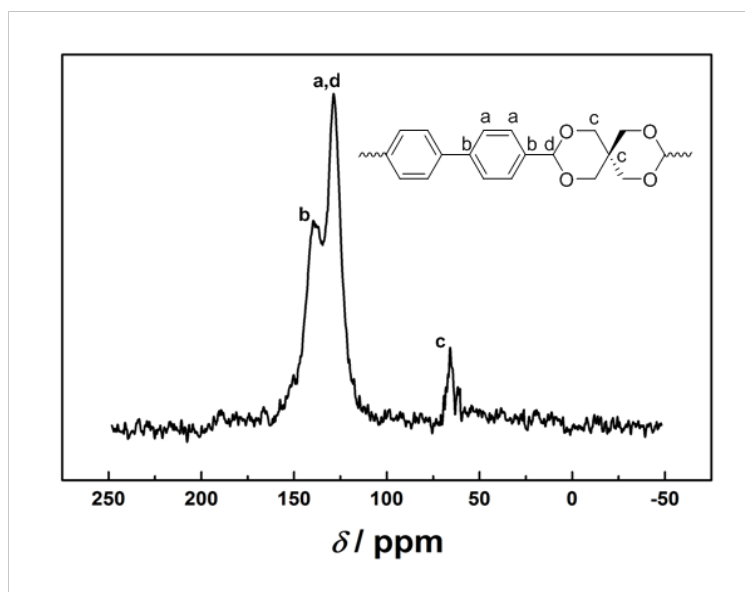

**Fig. S11** Solid-state  $^{13}\text{C}$  CP/MAS NMR spectrum of **APOP-2** recorded at the MAS rate of 5 kHz.

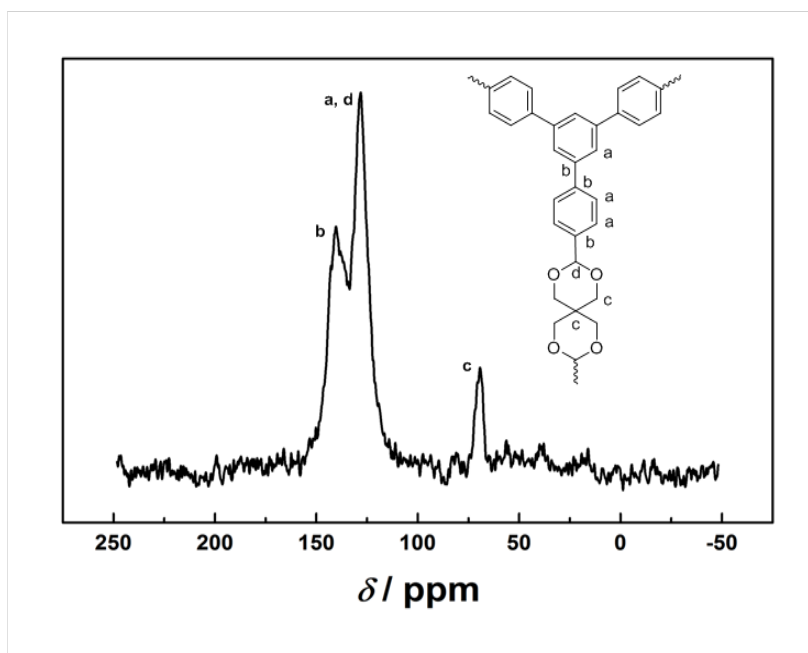

**Fig. S12** Solid-state  $^{13}\text{C}$  CP/MAS NMR spectrum of **APOP-3** recorded at the MAS rate of 5 kHz.

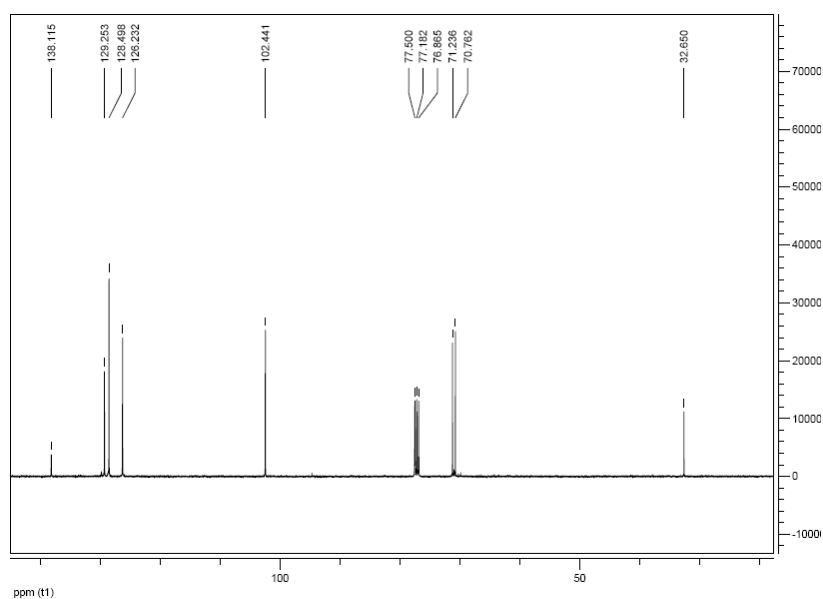

**Fig. S13** Liquid  $^{13}\text{C}$  NMR spectrum (100 MHz,  $\text{CDCl}_3$ ) of model compound dibenzalpenlopentaerythritol.

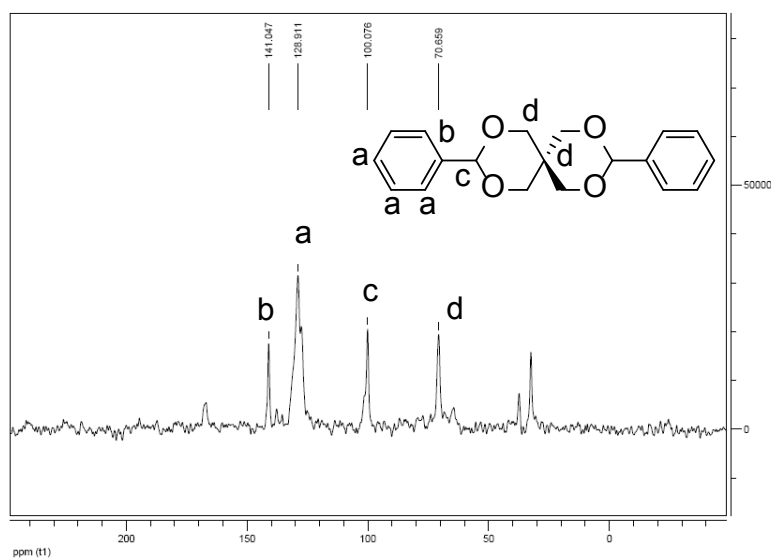

**Fig. S14** Solid-state  $^{13}\text{C}$  CP/MAS NMR spectrum of model compound dibenzalpenlopentaerythritol recorded at the MAS rate of 5 kHz.

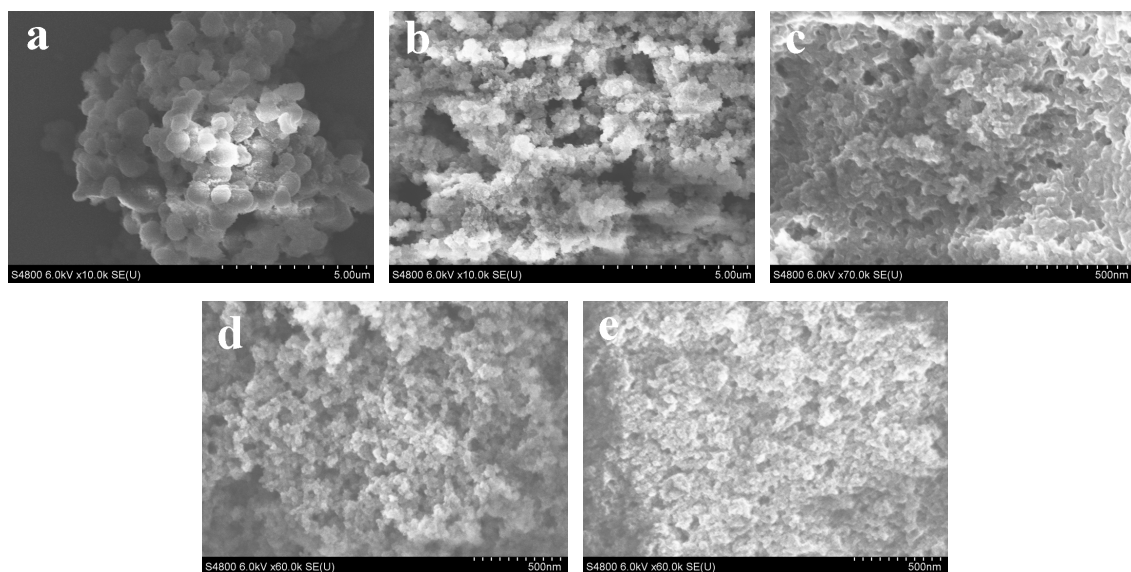

**Fig. S15** SEM images of APOP-1 (a), APOP-2 (b), APOP-3 (c), APOP-4 (d), and APOP-5 (e).

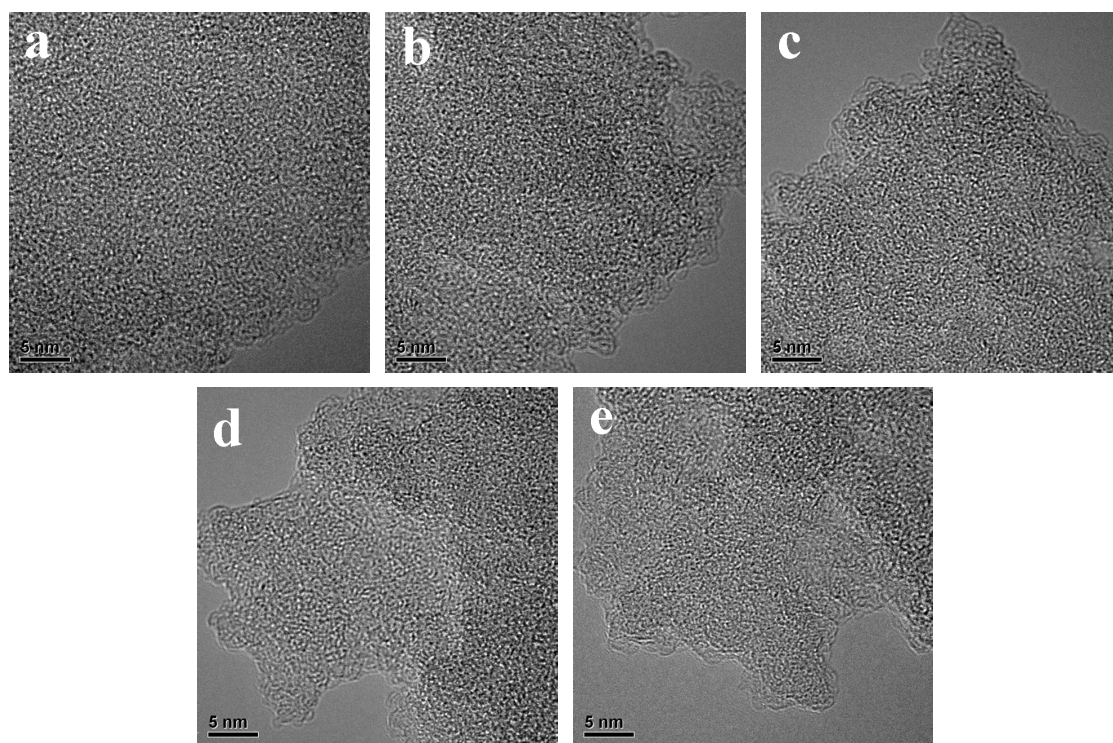

**Fig. S16** HR-TEM images of APOP-1 (a), APOP-2 (b), APOP-3 (c), APOP-4 (d), and APOP-5 (e).

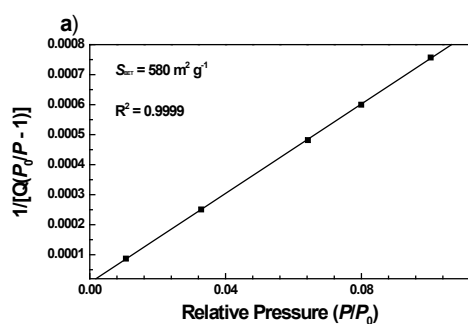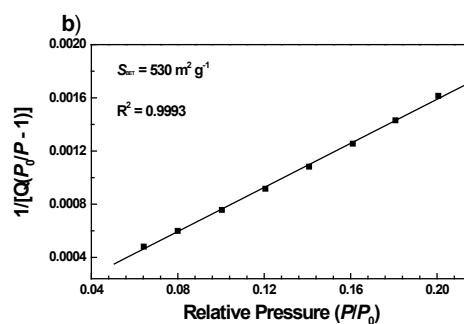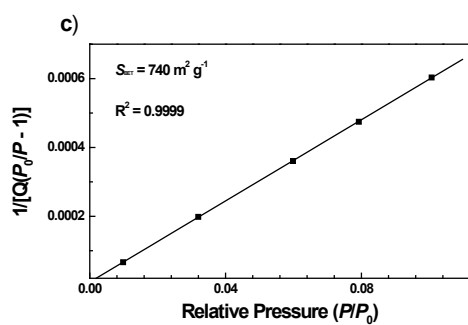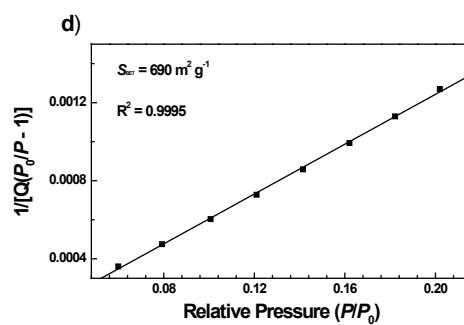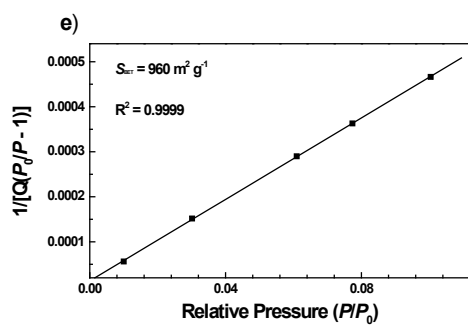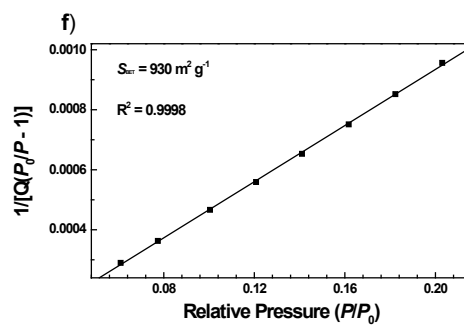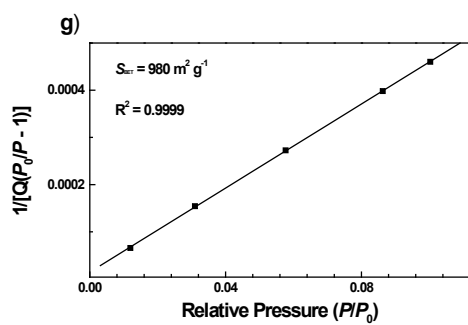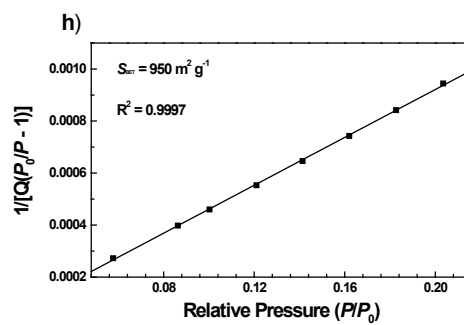

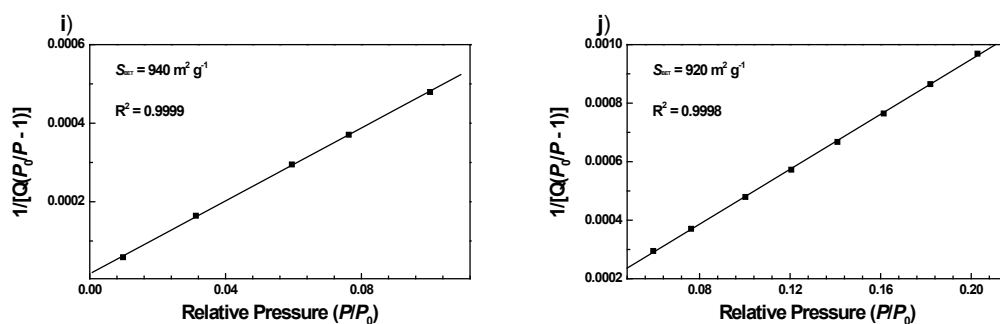

**Fig. S17** BET specific surface area plots for **APOP-1** (a and b), **APOP-2** (c and d), **APOP-3** (e and f), **APOP-4** (g and h) and **APOP-5** (i and j) calculated over different relative pressure ranges:  $P/P_0 = 0.01-0.10$  (a, c, e, g, and i) and  $P/P_0 = 0.05-0.20$  (b, d, f, h, and j), respectively.

**Table S1.** BET specific surface area data calculated over different pressure ranges

| Sample        | $P/P_0$ range | $S_{\text{BET}}$ ( $\text{m}^2 \text{g}^{-1}$ ) | Correlation coefficient | Points | $C$ constant <sup>a</sup> |
|---------------|---------------|-------------------------------------------------|-------------------------|--------|---------------------------|
| <b>APOP-1</b> | 0.01–0.10     | 580                                             | 0.9999                  | 5      | 1158                      |
| <b>APOP-1</b> | 0.05–0.20     | 530                                             | 0.9993                  | 8      | –121                      |
| <b>APOP-2</b> | 0.01–0.10     | 740                                             | 0.9999                  | 5      | 658                       |
| <b>APOP-2</b> | 0.05–0.20     | 690                                             | 0.9995                  | 8      | –185                      |
| <b>APOP-3</b> | 0.01–0.10     | 960                                             | 0.9999                  | 5      | 343                       |
| <b>APOP-3</b> | 0.05–0.20     | 930                                             | 0.9998                  | 8      | –4576                     |
| <b>APOP-4</b> | 0.01–0.10     | 980                                             | 0.9999                  | 5      | 305                       |
| <b>APOP-4</b> | 0.05–0.20     | 950                                             | 0.9998                  | 8      | 7274                      |
| <b>APOP-5</b> | 0.01–0.10     | 940                                             | 0.9999                  | 5      | 281                       |
| <b>APOP-5</b> | 0.05–0.20     | 920                                             | 0.9998                  | 8      | 431                       |

<sup>a</sup> The low relative pressure range of 0.01–0.10 using five points gives the higher  $C$  constant values and therefore the best fit to the BET equation.
